# Supplementary material
Source: publisher figshare collection journal article supplement (https://tandf.figshare.com/ndownloader/files/14016098)
Supplement: Supplementary file 1 [file 14016098]

## Supplementary Material

### **On the antioxidant activity of eumelanin biopigments: a quantitative comparison between free radical scavenging and redox properties**

Teresa Cecchi<sup>a†\*</sup>, Alessandro Pezzella<sup>b</sup>, Eduardo Di Mauro<sup>c</sup>, Samuel Cestola<sup>a</sup>, David Ginsburg<sup>a</sup>, and Mattia Luzi<sup>a</sup>, Alessandro Rigucci<sup>a</sup> Clara Santato<sup>c†\*</sup>

<sup>a</sup> ITT Montani, Via Montani 7, 63900 Fermo, FM, Italy.

<sup>b</sup> Dipartimento di Scienze Chimiche, Università di Napoli Federico II, Via Cintia 4, 80126 Napoli, Italy

<sup>c</sup> Department of Engineering Physics, Polytechnique Montreal, C.P. 6079, Succ. Centre-ville, Montreal, Quebec H3C 3A7, Canada.

<sup>†</sup> *clara.santato@polymtl.ca, teresa.cecchi@istruzione.it*

**Explanation of the chemistry involved in the Briggs Rauscher (BR) reaction (Eq.(1)):**

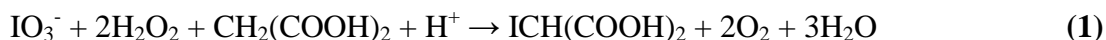

The BR reaction is accomplished through two reactions:

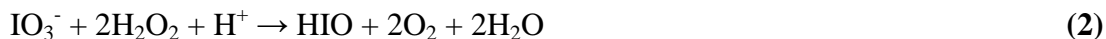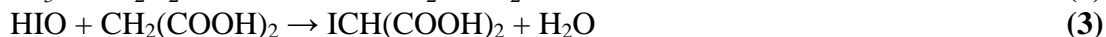

Eq.(2) follows a fast radical path, involving  $\text{HOO}\cdot$  and the redox chemistry of the catalyst ( $\text{Mn}^{++}$ ), when  $[\text{I}^-]$  is low, or a non-radical path, when the  $[\text{I}^-]$  is high.

Eq.(3) is a two-step reaction:

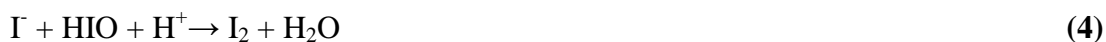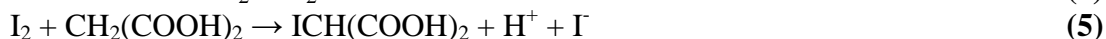

BR mixtures were prepared by mixing the appropriate amounts of stock solutions of hydrogen peroxide, iodate, perchloric acid, malonic acid and manganese sulphate using burettes in a 100-ml beaker to a total volume of 30 ml. One milliliter of starch solution was then added to the mixture.

The final composition of the BR mixture was:  $[\text{malonic acid}]=0.0500 \text{ M}$ ,  $[\text{Mn}^{2+}]=0.0067 \text{ M}$ ,  $[\text{HClO}_4]=0.03121 \text{ M}$ ,  $[\text{IO}_3^-]=0.0667 \text{ M}$ , and  $[\text{H}_2\text{O}_2]=0.8162 \text{ M}$ .

Upon initial mixing of the solutions,  $\text{IO}_3^-$  reacts with  $\text{H}_2\text{O}_2$  to produce, via a **fast, radical** path, a rapidly increasing  $[\text{IO}^-]$ .  $\text{IO}^-$  is partly reduced to  $\text{I}^-$  by  $\text{H}_2\text{O}_2$  and partly reacts with  $\text{I}^-$ , producing  $\text{I}_2$  according to Eq (4) (AMBER SOLUTION, RADICAL PATH).  $\text{I}_2$  reacts slowly with malonic acid, thereby causing an increase in  $[\text{I}^-]$  according to Eq. (5). Its high concentration triggers its reaction with  $\text{IO}_3^-$  and hence a **slow non-radical** production of  $\text{IO}^-$  (BLUE SOLUTION, NON RADICAL PATH).  $\text{IO}^-$  and  $\text{I}^-$  are consumed in the iodination of malonic acid at a faster rate compared to that of their slower production. Eventually  $[\text{I}^-]$  is reduced to such a low value that the radical process takes over again. This oscillating sequence repeats until the malonic acid or  $\text{IO}_3^-$  is depleted. The oscillations can be observed in Fig.S1 below. The video represents the sonification of the potentiometer output (mV). The sound pitch is proportional to the potential. The video originally stimulates a visual-auditory synesthesia. It elicits concomitant different percepts and a crossing of sensory wiring.

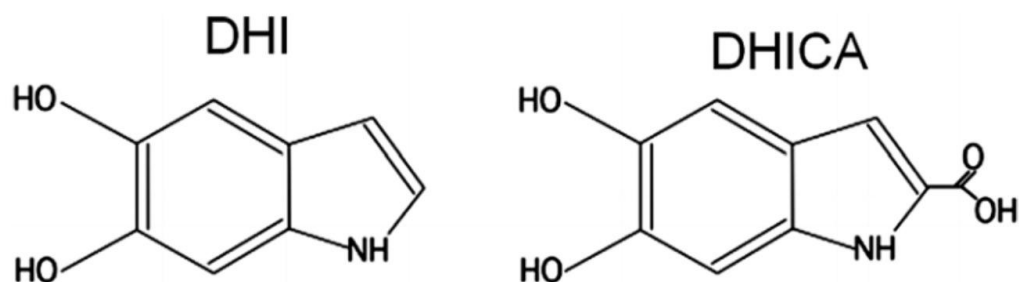

Fig. S1 Molecular structure of the melanins building blocks, namely 5,6-dihydroxyindole (DHI) and 5,6-dihydroxyindole-2-carboxylic acid (DHICA).

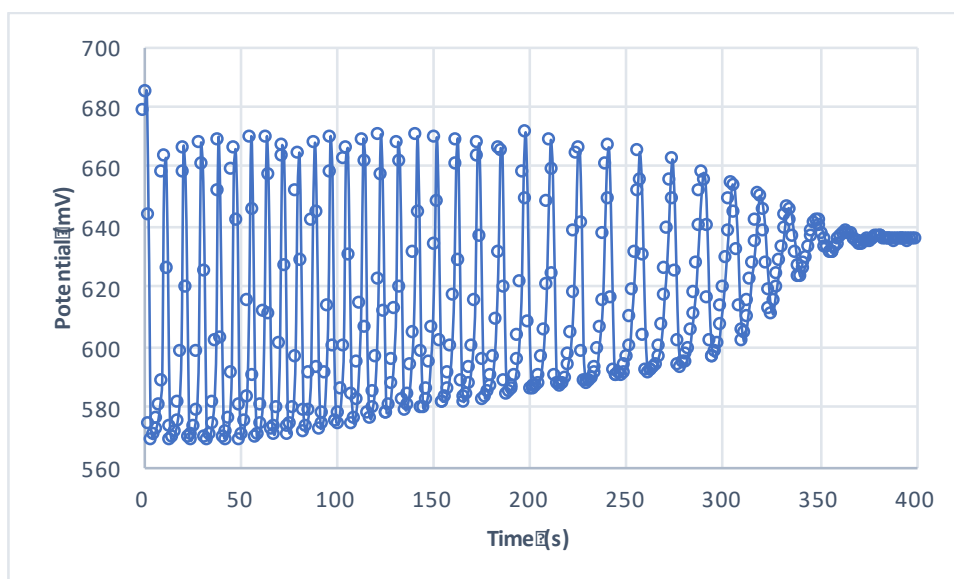

Fig. S2 Potential of a Pt electrode vs time for the active BR mixture without addition of antioxidants.

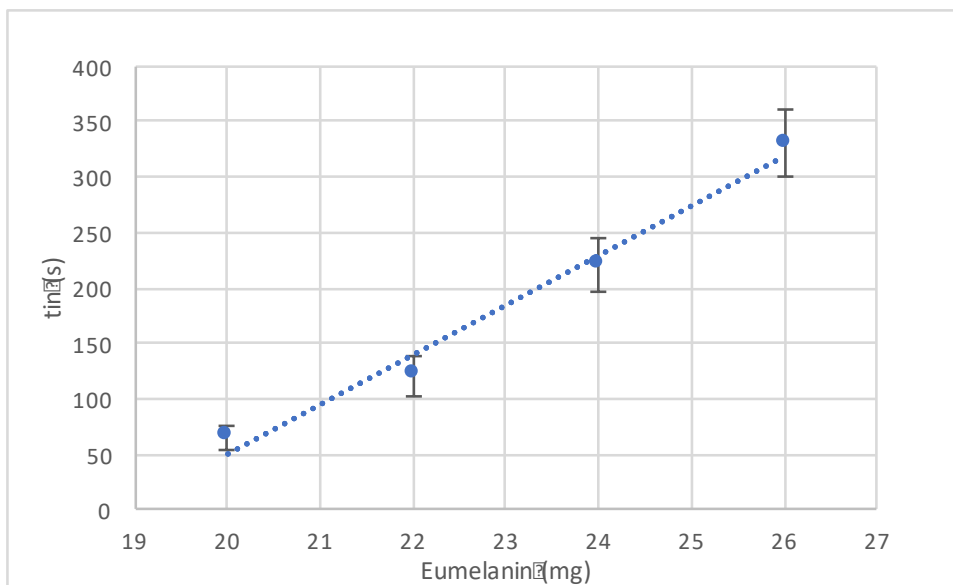

Fig. S3. Linear relationship between inhibition time ( $t_{in}$ ) and mass of eumelanin added to the oscillating BR mixture. Standard deviations are obtained from *triplicate* measurements.

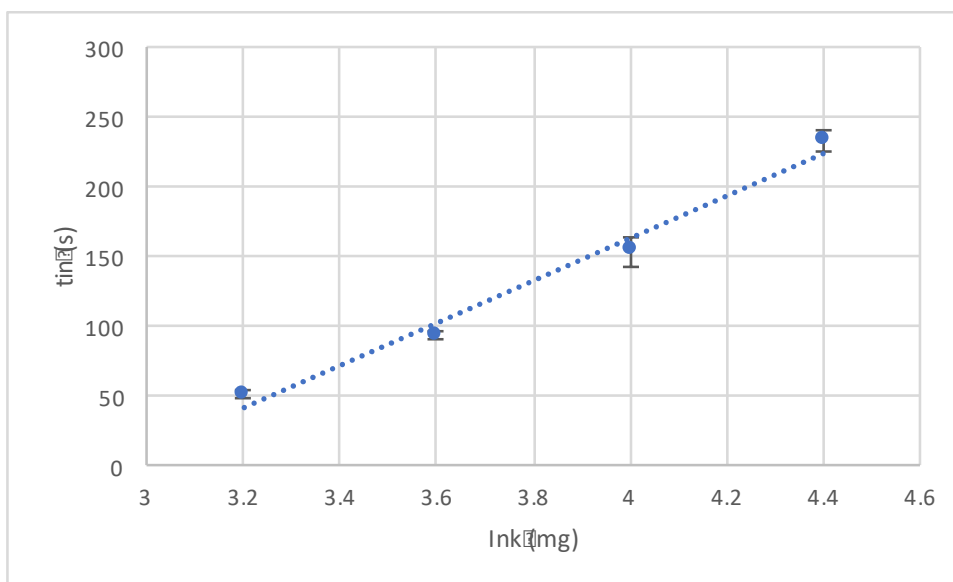

Fig. S4. Linear relationship between inhibition time ( $t_{in}$ ) and mass of ink added to the oscillating BR mixture. Standard deviations are obtained from *triplicate* measurements.

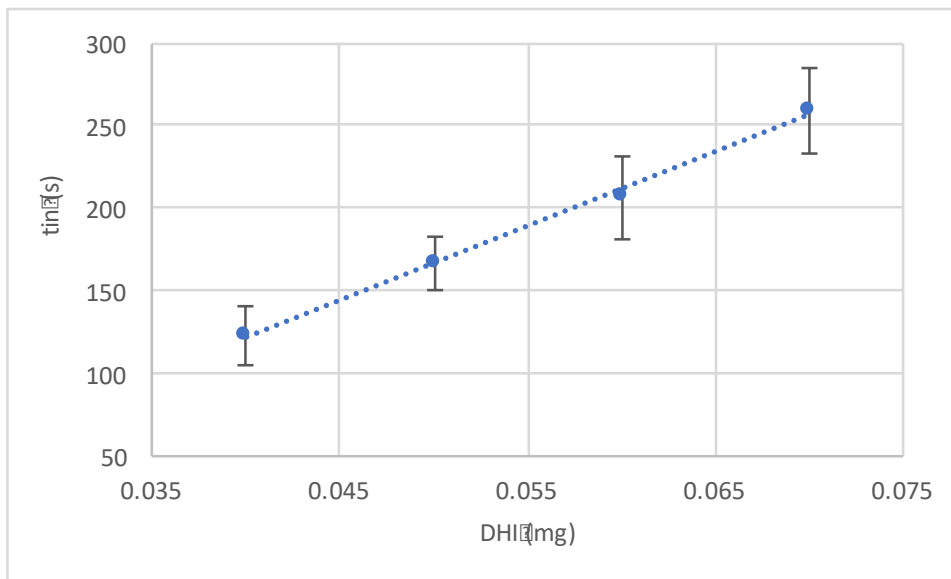

Fig. S5. Linear relationship between inhibition time ( $t_{in}$ ) and mass of DHI added to the oscillating BR mixture. Standard deviations are obtained from *triplicata* measurements.

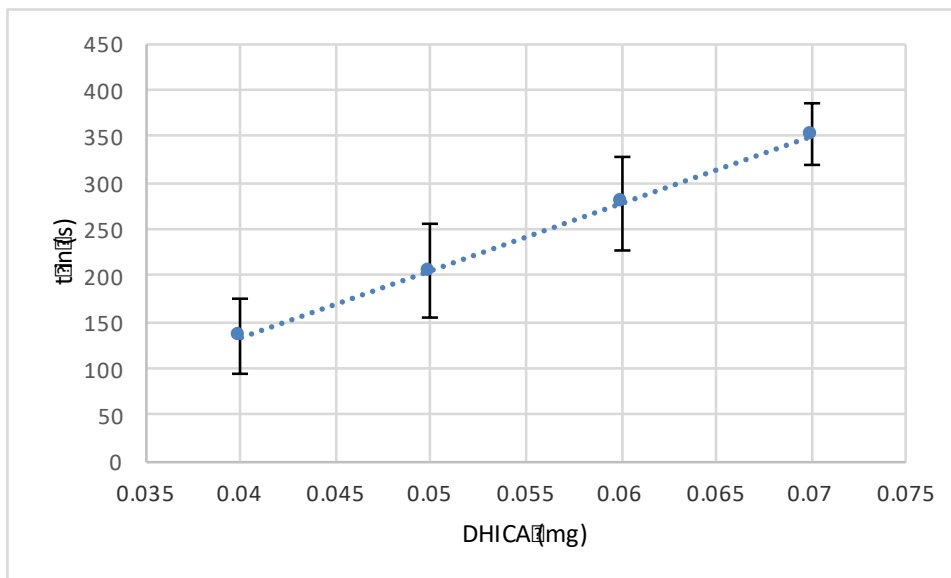

Fig. S6. Linear relationship between inhibition time ( $t_{in}$ ) and mass of DHICA added to the oscillating BR mixture. Standard deviations are obtained from *triplicata* measurements.
